# Supplementary material
Source: ML conference proceedings conference paper supplement (https://proceedings.mlr.press/v37/wen15.html)
Supplement: Supplementary file 1 [file wen15-supp.pdf]

## A. Proof for Theorem 1

To prove Theorem 1, we first prove the following theorem:

**Theorem 3.** *If (1)  $\bar{\mathbf{w}} = \Phi\theta^*$ , (2) the prior on  $\theta^*$  is  $N(0, \lambda^2 I)$ , and (3) the noises are i.i.d. sampled from  $N(0, \sigma^2)$ , then under CombLinTS algorithm with parameter  $(\Phi, \lambda, \sigma)$ , then we have*

$$R_{\text{Bayes}}(n) \leq 1 + K\lambda \min \left\{ \sqrt{\ln \left( \frac{\lambda Ln}{\sqrt{2\pi}} \right)}, \sqrt{d \ln \left( \frac{2dKn\lambda}{\sqrt{2\pi}} \right)} \right\} \sqrt{\frac{2dn \ln \left( 1 + \frac{nK\lambda^2}{d} \right)}{\ln \left( 1 + \frac{\lambda^2}{\sigma^2} \right)}}. \quad (10)$$

Notice that Theorem 1 follows immediately from Theorem 3. Specifically, if  $\lambda \geq \sigma$ , then we have

$$\begin{aligned} B_{\text{Bayes}}(n) &\leq 1 + K\lambda \min \left\{ \sqrt{\ln \left( \frac{\lambda Ln}{\sqrt{2\pi}} \right)}, \sqrt{d \ln \left( \frac{2dKn\lambda}{\sqrt{2\pi}} \right)} \right\} \sqrt{2dn \log_2 \left( 1 + \frac{nK\lambda^2}{d} \right)} \\ &= \tilde{O} \left( K\lambda \sqrt{dn \min \{ \ln(L), d \}} \right). \end{aligned} \quad (11)$$

We now outline the proof of Theorem 3, which is based on (Russo & Van Roy, 2013; Dani et al., 2008). Let  $\mathcal{H}_t$  denote the ‘‘history’’ (i.e. all the available information) by the start of episode  $t$ . Note that from the Bayesian perspective, conditioning on  $\mathcal{H}_t$ ,  $\theta^*$  and  $\theta_t$  are i.i.d. drawn from  $N(\bar{\theta}_t, \Sigma_t)$  (see (Russo & Van Roy, 2013)). This is because that conditioning on  $\mathcal{H}_t$ , the posterior belief in  $\theta^*$  is  $N(\bar{\theta}_t, \Sigma_t)$  and based on Algorithm 2,  $\theta_t$  is independently sampled from  $N(\bar{\theta}_t, \Sigma_t)$ . Since ORACLE is a fixed combinatorial optimization algorithm (even though it can be independently randomized), and  $E, \mathcal{A}, \Phi$  are all fixed, then conditioning on  $\mathcal{H}_t$ ,  $A^*$  and  $A^t$  are also i.i.d., furthermore,  $A^*$  is conditionally independent of  $\theta_t$ , and  $A^t$  is conditionally independent of  $\theta^*$ .

To simplify the exposition,  $\forall \theta \in \mathbb{R}^d$  and  $\forall A \subseteq E$ , we define

$$g(A, \theta) = \sum_{e \in A} \langle \phi_e, \theta \rangle, \quad (12)$$

then we have  $\mathbb{E}[f(A^*, \mathbf{w}_t) | \mathcal{H}_t, \theta^*, \theta_t, A^*, A^t] = g(A^*, \theta^*)$  and  $\mathbb{E}[f(A^t, \mathbf{w}_t) | \mathcal{H}_t, \theta^*, \theta_t, A^*, A^t] = g(A^t, \theta^*)$ , hence we have  $\mathbb{E}[R_t | \mathcal{H}_t] = \mathbb{E}[g(A^*, \theta^*) - g(A^t, \theta^*) | \mathcal{H}_t]$ . We also define the *upper confidence bound (UCB)* function  $U_t : 2^E \rightarrow \mathbb{R}$  as

$$U_t(A) = \sum_{e \in A} \left[ \langle \phi_e, \bar{\theta}_t \rangle + c \sqrt{\phi_e^T \Sigma_t \phi_e} \right], \quad (13)$$

where  $c > 0$  is a constant to be specified. Notice that conditioning on  $\mathcal{H}_t$ ,  $U_t$  is a deterministic function and  $A^*, A^t$  are i.i.d., then  $\mathbb{E}[U_t(A^t) - U_t(A^*) | \mathcal{H}_t] = 0$  and

$$\mathbb{E}[R_t | \mathcal{H}_t] = \mathbb{E}[g(A^*, \theta^*) - U_t(A^*) | \mathcal{H}_t] + \mathbb{E}[U_t(A^t) - g(A^t, \theta^*) | \mathcal{H}_t]. \quad (14)$$

One key observation is that

$$\begin{aligned} \mathbb{E}[U_t(A^t) - g(A^t, \theta^*) | \mathcal{H}_t] &\stackrel{(a)}{=} \sum_{e \in E} \mathbb{E} \left[ \mathbb{1}\{e \in A^t\} \left[ \langle \phi_e, \bar{\theta}_t - \theta^* \rangle + c \sqrt{\phi_e^T \Sigma_t \phi_e} \right] \middle| \mathcal{H}_t \right] \\ &\stackrel{(b)}{=} \sum_{e \in E} \mathbb{E} \left[ \mathbb{1}\{e \in A^t\} | \mathcal{H}_t \right] \mathbb{E} \left[ \langle \phi_e, \bar{\theta}_t - \theta^* \rangle | \mathcal{H}_t \right] + c \mathbb{E} \left[ \sum_{e \in A^t} \sqrt{\phi_e^T \Sigma_t \phi_e} \middle| \mathcal{H}_t \right] \\ &\stackrel{(c)}{=} c \mathbb{E} \left[ \sum_{e \in A^t} \sqrt{\phi_e^T \Sigma_t \phi_e} \middle| \mathcal{H}_t \right], \end{aligned} \quad (15)$$

where (b) follows from the fact that  $A^t$  and  $\theta^*$  are conditionally independent, and (c) follows from  $\mathbb{E}[\theta^* | \mathcal{H}_t] = \bar{\theta}_t$ . Hence  $B_{\text{Bayes}}(n) = \sum_{t=1}^n \mathbb{E}[g(A^*, \theta^*) - U_t(A^*)] + c \sum_{t=1}^n \mathbb{E} \left[ \sum_{e \in A^t} \sqrt{\phi_e^T \Sigma_t \phi_e} \right]$ . We can show that (1)

$\sum_{t=1}^n \mathbb{E}[g(A^*, \theta^*) - U_t(A^*)] \leq 1$  if we choose

$$c \geq \min \left\{ \sqrt{\ln \left( \frac{\lambda Ln}{\sqrt{2\pi}} \right)}, \sqrt{d \ln \left( \frac{2dKn\lambda}{\sqrt{2\pi}} \right)} \right\}, \quad (16)$$

and (2)  $\sum_{t=1}^n \mathbb{E} \left[ \sum_{e \in A^t} \sqrt{\phi_e^T \Sigma_t \phi_e} \right] \leq K\lambda \sqrt{2dn \ln \left( 1 + \frac{nK\lambda^2}{d} \right) / \ln \left( 1 + \frac{\lambda^2}{\sigma^2} \right)}$ . Thus, the bound in Theorem 3 holds. Please refer to the remainder of this section for the full proof.

### A.1. Bound on $\sum_{t=1}^n \mathbb{E}[g(A^*, \theta^*) - U_t(A^*)]$

We first prove that if we choose

$$c \geq \min \left\{ \sqrt{\ln \left( \frac{\lambda Ln}{\sqrt{2\pi}} \right)}, \sqrt{d \ln \left( \frac{2dKn\lambda}{\sqrt{2\pi}} \right)} \right\}, \quad (17)$$

then  $\sum_{t=1}^n \mathbb{E}[g(A^*, \theta^*) - U_t(A^*)] \leq 1$ . To prove this result, we use the following inequality for truncated Gaussian distribution.

**Lemma 1.** *If  $X \sim N(\mu, s^2)$ , then we have*

$$\mathbb{E}[X \mathbf{1}\{X \geq 0\}] = \mu \left[ 1 - \Phi_G \left( \frac{-\mu}{s} \right) \right] + \frac{s}{\sqrt{2\pi}} \exp \left( -\frac{\mu^2}{2s^2} \right),$$

where  $\Phi_G$  is the cumulative distribution function (CDF) of the standard Gaussian distribution  $N(0, 1)$ . Furthermore, if  $\mu \leq 0$ , we have  $\mathbb{E}[X \mathbf{1}\{X \geq 0\}] \leq \frac{s}{\sqrt{2\pi}} \exp \left( -\frac{\mu^2}{2s^2} \right)$ .

Based on Lemma 1, we can prove the following lemmas:

**Lemma 2.** *If  $c \geq \sqrt{\ln \left( \frac{\lambda Ln}{\sqrt{2\pi}} \right)}$ , then we have  $\sum_{t=1}^n \mathbb{E}[g(A^*, \theta^*) - U_t(A^*)] \leq 1$ .*

*Proof.* We have the following naive bound:

$$\begin{aligned} g(A^*, \theta^*) - U_t(A^*) &= \sum_{e \in A^*} \left[ \langle \phi_e, \theta^* - \bar{\theta}_t \rangle - c \sqrt{\phi_e^T \Sigma_t \phi_e} \right] \\ &\leq \sum_{e \in A^*} \left[ \langle \phi_e, \theta^* - \bar{\theta}_t \rangle - c \sqrt{\phi_e^T \Sigma_t \phi_e} \right] \mathbf{1} \left\{ \langle \phi_e, \theta^* - \bar{\theta}_t \rangle - c \sqrt{\phi_e^T \Sigma_t \phi_e} \geq 0 \right\} \\ &\leq \sum_{e \in E} \left[ \langle \phi_e, \theta^* - \bar{\theta}_t \rangle - c \sqrt{\phi_e^T \Sigma_t \phi_e} \right] \mathbf{1} \left\{ \langle \phi_e, \theta^* - \bar{\theta}_t \rangle - c \sqrt{\phi_e^T \Sigma_t \phi_e} \geq 0 \right\}. \end{aligned}$$

Notice that conditioning on  $\mathcal{H}_t$ ,  $\langle \phi_e, \theta^* - \bar{\theta}_t \rangle - c \sqrt{\phi_e^T \Sigma_t \phi_e}$  is a Gaussian random variable with mean  $-c \sqrt{\phi_e^T \Sigma_t \phi_e}$  and variance  $\phi_e^T \Sigma_t \phi_e$ . Thus, from Lemma 1, we have

$$\begin{aligned} &\mathbb{E}_{\theta^*, A^*} [g(A^*, \theta^*) - U_t(A^*) | \mathcal{H}_t] \\ &\stackrel{(a)}{\leq} \sum_{e \in E} \mathbb{E}_{\theta^*} \left[ \left[ \langle \phi_e, \theta^* - \bar{\theta}_t \rangle - c \sqrt{\phi_e^T \Sigma_t \phi_e} \right] \mathbf{1} \left\{ \langle \phi_e, \theta^* - \bar{\theta}_t \rangle - c \sqrt{\phi_e^T \Sigma_t \phi_e} \geq 0 \right\} \middle| \mathcal{H}_t \right] \\ &\stackrel{(b)}{\leq} \sum_{e \in E} \sqrt{\frac{\phi_e^T \Sigma_t \phi_e}{2\pi}} \exp \left( -\frac{c^2}{2} \right) \\ &\stackrel{(c)}{\leq} \exp \left( -\frac{c^2}{2} \right) \sum_{e \in E} \frac{\lambda \|\phi_e\|}{\sqrt{2\pi}} \leq \exp \left( -\frac{c^2}{2} \right) \frac{\lambda L}{\sqrt{2\pi}}, \end{aligned} \quad (18)$$

where the last two inequalities follow from the fact that  $\phi_e^T \Sigma_t \phi_e \leq \phi_e^T \Sigma_1 \phi_e \leq \lambda^2 \|\phi_e\|^2 \leq \lambda^2$ , since  $\|\phi_e\| \leq 1$  by assumption<sup>8</sup>. Thus we have

$$\mathbb{E} \left[ \sum_{t=1}^n [g(A^*, \theta^*) - U_t(A^*)] \right] \leq \exp \left( -\frac{c^2}{2} \right) \frac{n\lambda L}{\sqrt{2\pi}}. \quad (19)$$

If we choose  $c \geq \sqrt{2 \ln \left( \frac{\lambda L n}{\sqrt{2\pi}} \right)}$ , then we have  $\mathbb{E} [\sum_{t=1}^n [g(A^*, \theta^*) - U_t(A^*)]] \leq 1$ .  $\square$

**Lemma 3.** *If  $c \geq \sqrt{d \ln \left( \frac{2dKn\lambda}{\sqrt{2\pi}} \right)}$ , then we also have  $\sum_{t=1}^n \mathbb{E} [g(A^*, \theta^*) - U_t(A^*)] \leq 1$ .*

*Proof.* We use  $v_1, \dots, v_d$  to denote a fixed set of  $d$  orthonormal eigenvectors of  $\Sigma_t$ , and  $\Lambda_1^2, \dots, \Lambda_d^2$  to denote the associated eigenvalues. Notice that for  $i \neq j$ , we have  $v_i^T \Sigma_t v_j = \Lambda_i^2 v_i^T v_j = 0$ .  $\forall i = 1, \dots, d$ , we define  $v_{i+d} = -v_i$  and  $\Lambda_{i+d} = \Lambda_i$ , which allows us to define the following conic decomposition:

$$\phi_e = \sum_{i=1}^{2d} \alpha_{ei} v_i, \quad \forall e \in E,$$

subject to the constraints that  $\alpha_{ei} \geq 0, \forall (e, i)$ . Notice that  $\alpha_{ei}$ 's are uniquely determined. Furthermore, for  $i$  and  $j$  s.t.  $|i - j| = d$ , by definition of conic decomposition, we have  $\alpha_{ei} \alpha_{ej} = 0$ . In other words,  $\alpha_e$  is a  $d$ -sparse vector.

Since we assume that  $\|\phi_e\| \leq 1$ , we have that  $\sum_{i=1}^{2d} \alpha_{ei}^2 \leq 1, \forall e \in E$ . Thus, for any  $e$ , we have that  $\langle \phi_e, \theta^* - \bar{\theta}_t \rangle = \sum_{i=1}^{2d} \alpha_{ei} \langle v_i, \theta^* - \bar{\theta}_t \rangle$  and

$$\begin{aligned} \phi_e^T \Sigma_t \phi_e &= \left( \sum_{i=1}^{2d} \alpha_{ei} v_i^T \right) \Sigma_t \left( \sum_{j=1}^{2d} \alpha_{ej} v_j \right) \\ &= \sum_{i=1}^{2d} \sum_{j=1}^{2d} \alpha_{ei} \alpha_{ej} v_i^T \Sigma_t v_j. \end{aligned} \quad (20)$$

Notice that for  $i \neq j$ , if  $|i - j| \neq d$ , then  $v_i^T \Sigma_t v_j = 0$ ; on the other hand, if  $|i - j| = d$ ,  $\alpha_{ei} \alpha_{ej} = 0$ . Thus, if  $i \neq j$ , we have  $\alpha_{ei} \alpha_{ej} v_i^T \Sigma_t v_j = 0$ . Consequently,

$$\phi_e^T \Sigma_t \phi_e = \sum_{i=1}^{2d} \alpha_{ei}^2 v_i^T \Sigma_t v_i = \sum_{i=1}^{2d} \alpha_{ei}^2 \Lambda_i^2.$$

Thus we have

$$\sqrt{\phi_e^T \Sigma_t \phi_e} = \sqrt{\sum_{i=1}^{2d} \alpha_{ei}^2 \Lambda_i^2} \geq \frac{1}{\sqrt{d}} \sum_{i=1}^{2d} \alpha_{ei} \Lambda_i, \quad (21)$$

where the inequality follows from Cauchy-Schwartz inequality, specifically, define  $s_i = 1$  if  $\alpha_{ei} \Lambda_i \neq 0$ , and  $s_i = 0$  if  $\alpha_{ei} \Lambda_i = 0$ , then we have

$$\sum_{i=1}^{2d} \alpha_{ei} \Lambda_i = \sum_{i=1}^{2d} \alpha_{ei} \Lambda_i s_i \leq \sqrt{\sum_{i=1}^{2d} s_i^2} \sqrt{\sum_{i=1}^{2d} \alpha_{ei}^2 \Lambda_i^2} \leq \sqrt{d} \sqrt{\sum_{i=1}^{2d} \alpha_{ei}^2 \Lambda_i^2},$$

<sup>8</sup>Notice that in the derivation of Inequality (18), we implicitly assume that  $\phi_e^T \Sigma_t \phi_e > 0, \forall e \in E$ . It is worth pointing out that the case with  $\phi_e^T \Sigma_t \phi_e = 0$  is a trivial case and this inequality still holds in this case.

where the last inequality follows from the fact that  $\alpha_e$  is  $d$ -sparse. Thus, for any  $e$ , we have that

$$\langle \phi_e, \theta^* - \bar{\theta}_t \rangle - c\sqrt{\phi_e^T \Sigma_t \phi_e} \leq \sum_{i=1}^{2d} \alpha_{ei} \langle v_i, \theta^* - \bar{\theta}_t \rangle - \frac{c}{\sqrt{d}} \sum_{i=1}^{2d} \alpha_{ei} \Lambda_i. \quad (22)$$

Consequently, we have

$$\sum_{e \in A^*} \left[ \langle \phi_e, \theta^* - \bar{\theta}_t \rangle - c\sqrt{\phi_e^T \Sigma_t \phi_e} \right] \leq \sum_{i=1}^{2d} \left( \langle v_i, \theta^* - \bar{\theta}_t \rangle - \frac{c\Lambda_i}{\sqrt{d}} \right) \left( \sum_{e \in A^*} \alpha_{ei} \right). \quad (23)$$

Define  $X_i = \langle v_i, \theta^* - \bar{\theta}_t \rangle - \frac{c\Lambda_i}{\sqrt{d}}$ , notice that conditioning on  $\mathcal{H}_t$ , we have  $X_i | \mathcal{H}_t \sim N\left(-\frac{c\Lambda_i}{\sqrt{d}}, \Lambda_i^2\right)$ . Hence we have

$$\begin{aligned} \sum_{e \in A^*} \langle \phi_e, \theta^* - \bar{\theta}_t \rangle - c\sqrt{\phi_e^T \Sigma_t \phi_e} &\stackrel{(a)}{\leq} \sum_{i=1}^{2d} X_i \left[ \sum_{e \in A^*} \alpha_{ei} \right] \\ &\stackrel{(b)}{\leq} \sum_{i=1}^{2d} X_i \mathbf{1}\{X_i \geq 0\} \left[ \sum_{e \in A^*} \alpha_{ei} \right], \end{aligned}$$

where the inequality (b) follows from the fact that  $X_i \leq X_i \mathbf{1}\{X_i \geq 0\}$  and  $[\sum_{e \in A^*} \alpha_{ei}] \geq 0$ . On the other hand, notice that  $|A^*| \leq K$

$$\sum_{e \in A^*} \alpha_{ei} \leq \sqrt{|A^*|} \sqrt{\sum_{e \in A^*} \alpha_{ei}^2} \leq \sqrt{|A^*|} \sqrt{\sum_{e \in A^*} \sum_{j=1}^d \alpha_{ej}^2} \leq \sqrt{|A^*|} \sqrt{\sum_{e \in A^*} 1} = |A^*| \leq K.$$

Since  $X_i \mathbf{1}\{X_i \geq 0\} \geq 0$ , we have

$$\sum_{e \in A^*} \langle \phi_e, \theta^* - \bar{\theta}_t \rangle - c\sqrt{\phi_e^T \Sigma_t \phi_e} \leq K \sum_{i=1}^{2d} X_i \mathbf{1}\{X_i \geq 0\},$$

notice that the RHS does not include  $A^*$ . Hence we have

$$\begin{aligned} \mathbb{E}_{\theta^*} [g(A^*, \theta^*) - U_t(A^*) | \mathcal{H}_t] &= \mathbb{E}_{\theta^*} \left[ \sum_{e \in A^*} \langle \phi_e, \theta^* - \bar{\theta}_t \rangle - c\sqrt{\phi_e^T \Sigma_t \phi_e} \middle| \mathcal{H}_t \right] \\ &\leq K \sum_{i=1}^{2d} \mathbb{E}_{\theta^*} [X_i \mathbf{1}\{X_i \geq 0\} | \mathcal{H}_t] \\ &\leq K \sum_{i=1}^{2d} \frac{\Lambda_i}{\sqrt{2\pi}} \exp\left(-\frac{c^2}{2d}\right) \leq \frac{2dK\lambda}{\sqrt{2\pi}} \exp\left(-\frac{c^2}{2d}\right), \end{aligned}$$

where the last inequality follows from the fact that  $\Lambda_i \leq \lambda$ . Hence we have

$$\sum_{t=1}^n \mathbb{E} [g(A^*, \theta^*) - U_t(A^*)] \leq \frac{2dK\lambda}{\sqrt{2\pi}} \exp\left(-\frac{c^2}{2d}\right),$$

if we choose  $c \geq \sqrt{2d \ln\left(\frac{2dK\lambda}{\sqrt{2\pi}}\right)}$ , then we have  $\sum_{t=1}^n \mathbb{E} [f(A^*, \theta^*) - U_t(A^*)] \leq 1$ .  $\square$

Combining the results from Lemma 2 and 3, we have proved that if

$$c \geq \min \left\{ \sqrt{\ln \left( \frac{\lambda Ln}{\sqrt{2\pi}} \right)}, \sqrt{d \ln \left( \frac{2dKn\lambda}{\sqrt{2\pi}} \right)} \right\},$$

then  $\sum_{t=1}^n \mathbb{E}[g(A^*, \theta^*) - U_t(A^*)] \leq 1$ .

### A.2. Bound on $\sum_{t=1}^n \mathbb{E} \left[ \sum_{e \in A^t} \sqrt{\phi_e^T \Sigma_t \phi_e} \right]$

In this subsection, we derive a bound on  $\sum_{t=1}^n \mathbb{E} \left[ \sum_{e \in A^t} \sqrt{\phi_e^T \Sigma_t \phi_e} \right]$ . Our analysis is motivated by the analysis in (Dani et al., 2008). Specifically, we provide a worst-case bound on  $\sum_{t=1}^n \sum_{e \in A^t} \sqrt{\phi_e^T \Sigma_t \phi_e}$ , for any realization of random variable  $\mathbf{w}_t$ 's,  $\theta_t$ 's,  $A^t$ 's,  $A^*$ , and  $\theta^*$ .

**Lemma 4.**  $\sum_{t=1}^n \sum_{e \in A^t} \sqrt{\phi_e^T \Sigma_t \phi_e} \leq K\lambda \sqrt{\frac{dn \log \left( 1 + \frac{nK\lambda^2}{d\sigma^2} \right)}{\log \left( 1 + \frac{\lambda^2}{\sigma^2} \right)}}$ .

*Proof.* To simplify the exposition, we define

$$z_{t,k} = \sqrt{\phi_{a_k}^T \Sigma_t \phi_{a_k}}. \quad (24)$$

First, notice that  $\Sigma_t^{-1}$  is the Gramian matrix and satisfies

$$\Sigma_{t+1}^{-1} = \Sigma_t^{-1} + \frac{1}{\sigma^2} \sum_{k=1}^{|A^t|} \phi_{a_k} \phi_{a_k}^T. \quad (25)$$

Hence for any  $t, k$ , we have that

$$\begin{aligned} \det [\Sigma_{t+1}^{-1}] &\geq \det \left[ \Sigma_t^{-1} + \frac{1}{\sigma^2} \phi_{a_k} \phi_{a_k}^T \right] = \det \left[ \Sigma_t^{-\frac{1}{2}} \left( I + \frac{1}{\sigma^2} \Sigma_t^{\frac{1}{2}} \phi_{a_k} \phi_{a_k}^T \Sigma_t^{\frac{1}{2}} \right) \Sigma_t^{-\frac{1}{2}} \right] \\ &= \det [\Sigma_t^{-1}] \det \left[ I + \frac{1}{\sigma^2} \Sigma_t^{\frac{1}{2}} \phi_{a_k} \phi_{a_k}^T \Sigma_t^{\frac{1}{2}} \right] = \det [\Sigma_t^{-1}] \left( 1 + \frac{1}{\sigma^2} \phi_{a_k}^T \Sigma_t \phi_{a_k} \right) \\ &= \det [\Sigma_t^{-1}] \left( 1 + \frac{z_{t,k}^2}{\sigma^2} \right). \end{aligned} \quad (26)$$

Hence we have that

$$\left( \det [\Sigma_{t+1}^{-1}] \right)^{|A^t|} \geq \left( \det [\Sigma_t^{-1}] \right)^{|A^t|} \prod_{k=1}^{|A^t|} \left( 1 + \frac{z_{t,k}^2}{\sigma^2} \right). \quad (27)$$

**Remark 1.** This is where the extra  $O(\sqrt{K})$  factor arises. Notice that this extra factor is purely due to linear generalization. Specifically, if  $\Phi = I$ , then  $\Sigma_t$ 's and  $\Sigma_t^{-1}$ 's will be diagonal, and we have

$$\det [\Sigma_{t+1}^{-1}] = \det [\Sigma_t^{-1}] \prod_{k=1}^{|A^t|} \left( 1 + \frac{z_{t,k}^2}{\sigma^2} \right). \quad (28)$$

Notice that Equation 27 further implies that

$$\left( \det [\Sigma_{t+1}^{-1}] \right)^K \geq \left( \det [\Sigma_t^{-1}] \right)^K \prod_{k=1}^{|A^t|} \left( 1 + \frac{z_{t,k}^2}{\sigma^2} \right), \quad (29)$$

since  $\det [\Sigma_{t+1}^{-1}] \geq \det [\Sigma_t^{-1}]$  and  $|A^t| \leq K$ . Recall that  $\det [\Sigma_1^{-1}] = (\frac{1}{\lambda^2})^d$ , we have that

$$(\det [\Sigma_{n+1}^{-1}])^K \geq (\det [\Sigma_1^{-1}])^K \prod_{t=1}^n \prod_{k=1}^{|A^t|} \left(1 + \frac{z_{t,k}^2}{\sigma^2}\right) = \frac{1}{\lambda^{2dK}} \prod_{t=1}^n \prod_{k=1}^{|A^t|} \left(1 + \frac{z_{t,k}^2}{\sigma^2}\right). \quad (30)$$

On the other hand, we have

$$\text{trace} [\Sigma_{n+1}^{-1}] = \text{trace} \left[ \frac{1}{\lambda^2} I + \frac{1}{\sigma^2} \sum_{t=1}^n \sum_{k=1}^{|A^t|} \phi_{a_k^t} \phi_{a_k^t}^T \right] = \frac{d}{\lambda^2} + \frac{1}{\sigma^2} \sum_{t=1}^n \sum_{k=1}^{|A^t|} \|\phi_{a_k^t}\|^2 \leq \frac{d}{\lambda^2} + \frac{nK}{\sigma^2}, \quad (31)$$

where the last inequality follows from the assumption that  $\|\phi_e\| \leq 1, \forall e \in E$  and  $|A^t| \leq K$ . From the trace-determinant inequality, we have

$$\frac{1}{d} \text{trace} [\Sigma_{n+1}^{-1}] \geq (\det [\Sigma_{n+1}^{-1}])^{\frac{1}{d}},$$

which implies that

$$\left(\frac{1}{\lambda^2} + \frac{nK}{d\sigma^2}\right)^{dK} \geq \left(\frac{1}{d} \text{trace} [\Sigma_{n+1}^{-1}]\right)^{dK} \geq (\det [\Sigma_{n+1}^{-1}])^K \geq \frac{1}{\lambda^{2dK}} \prod_{t=1}^n \prod_{k=1}^{|A^t|} \left(1 + \frac{z_{t,k}^2}{\sigma^2}\right).$$

Taking the logarithm, we have

$$dK \log \left(1 + \frac{nK\lambda^2}{d\sigma^2}\right) \geq \sum_{t=1}^n \sum_{k=1}^{|A^t|} \log \left(1 + \frac{z_{t,k}^2}{\sigma^2}\right). \quad (32)$$

Notice that  $z_{t,k}^2 = \phi_{a_k^t}^T \Sigma_t \phi_{a_k^t}$ , hence we have that  $0 \leq z_{t,k}^2 \leq \phi_{a_k^t}^T \Sigma_1 \phi_{a_k^t} \leq \lambda^2 \|\phi_{a_k^t}\|^2 \leq \lambda^2$ . We have the following technical lemma:

**Lemma 5.** For any real number  $x \in [0, \lambda^2]$ , we have  $x \leq \frac{\lambda^2}{\log(1 + \frac{\lambda^2}{\sigma^2})} \log(1 + \frac{x}{\sigma^2})$ .

*Proof.* Define  $h(x) = \frac{\lambda^2}{\log(1 + \frac{\lambda^2}{\sigma^2})} \log(1 + \frac{x}{\sigma^2}) - x$ , thus we only need to prove  $h(x) \geq 0$  for  $x \in [0, \lambda^2]$ . Notice that  $h(x)$  is a strictly concave function for  $x \geq 0$ , and  $h(0) = 0, h(\lambda^2) = 0$ . From Jensen's inequality, for any  $x \in (0, \lambda^2)$ , we have  $h(x) > 0$ .  $\square$

Hence we have that

$$\sum_{t=1}^n \sum_{k=1}^{|A^t|} z_{t,k}^2 \leq \frac{\lambda^2}{\log(1 + \frac{\lambda^2}{\sigma^2})} \sum_{t=1}^n \sum_{k=1}^{|A^t|} \log \left(1 + \frac{z_{t,k}^2}{\sigma^2}\right) \leq \frac{dK\lambda^2 \log(1 + \frac{nK\lambda^2}{d\sigma^2})}{\log(1 + \frac{\lambda^2}{\sigma^2})} \quad (33)$$

Finally, we have that

$$\sum_{t=1}^n \sum_{k=1}^{|A^t|} z_{t,k} \leq \sqrt{nK} \sqrt{\sum_{t=1}^n \sum_{k=1}^{|A^t|} z_{t,k}^2} \leq K\lambda \sqrt{\frac{dn \log(1 + \frac{nK\lambda^2}{d\sigma^2})}{\log(1 + \frac{\lambda^2}{\sigma^2})}}. \quad (34)$$

$\square$

Recall that the above bound holds for any realization of random variables, thus, we have

$$\mathbb{E} \left[ \sum_{t=1}^n [U_t(A^t) - g(A^t, \theta^*)] \right] = c \mathbb{E} \left[ \sum_{t=1}^n \sum_{k=1}^{|A^t|} z_{t,k} \right] \leq cK\lambda \sqrt{\frac{dn \log \left(1 + \frac{nK\lambda^2}{d}\right)}{\log \left(1 + \frac{\lambda^2}{\sigma^2}\right)}}.$$

With

$$c = \min \left\{ \sqrt{\ln \left( \frac{\lambda Ln}{\sqrt{2\pi}} \right)}, \sqrt{d \ln \left( \frac{2dKn\lambda}{\sqrt{2\pi}} \right)} \right\}, \quad (35)$$

and combining the results in the previous subsection, we have proved Theorem 3.

## B. Proof for Theorem 2

We start by writing an alternative formula for  $\Sigma_t$  and  $\bar{\theta}_t$ . Notice that based on Algorithm 1, we have:

$$\begin{aligned} \Sigma_t^{-1} &= \frac{1}{\lambda^2} I + \frac{1}{\sigma^2} \sum_{\tau=1}^{t-1} \sum_{k=1}^{|A^\tau|} \phi_{a_k^\tau} \phi_{a_k^\tau}^T \\ \Sigma_t^{-1} \bar{\theta}_t &= \frac{1}{\sigma^2} \sum_{\tau=1}^{t-1} \sum_{k=1}^{|A^\tau|} \phi_{a_k^\tau} \mathbf{w}_\tau(a_k^\tau) \end{aligned} \quad (36)$$

Interested readers might refer to Appendix C for the derivation of Equation (36). The proof proceeds as follows. We first construct a confidence set of  $\theta^*$  based on the ‘‘self normalized bound’’ developed in (Abbasi-Yadkori et al., 2011). Then we derive a regret bound based on Lemma 4 derived above.

### B.1. Confidence Set

Our construction of confidence set is motivated by the analysis in (Agrawal & Goyal, 2013). We start by defining some useful notation. Specifically, for any  $t = 1, 2, \dots, n$ , any  $k = 1, 2, \dots, |A^t|$ , we define

$$\eta_{t,k} = \mathbf{w}_t(a_k^t) - \bar{\mathbf{w}}(a_k^t).$$

One key observation is that  $\eta_{t,k}$ ’s form a Martingale difference sequence (MDS)<sup>9</sup> since  $\mathbf{w}(e)$ ’s are statistically independent under  $P$ . Moreover, since  $\mathbf{w}_t(a_k^t)$  is bounded in interval  $[0, 1]$ ,  $\eta_{t,k}$ ’s are sub-Gaussian with constant  $R = 1$ . We further define

$$\begin{aligned} V_t &= \frac{\sigma^2}{\lambda^2} I + \sum_{\tau=1}^{t-1} \sum_{k=1}^{|A^\tau|} \phi_{a_k^\tau} \phi_{a_k^\tau}^T \\ \xi_t &= \sum_{\tau=1}^{t-1} \sum_{k=1}^{|A^\tau|} \phi_{a_k^\tau} \eta_{\tau,k} \end{aligned}$$

As we will see later, we define  $V_t$  and  $\xi_t$  to use the ‘‘self normalized bound’’ developed in (Abbasi-Yadkori et al., 2011) (see Theorem 1 of (Abbasi-Yadkori et al., 2011)). Notice that based on the above definition, we have  $\Sigma_t^{-1} = \frac{1}{\sigma^2} V_t$ , and

$$\bar{\theta}_t - \theta^* = \Sigma_t \left( \frac{1}{\sigma^2} \xi_t - \frac{1}{\lambda^2} \theta^* \right).$$

<sup>9</sup>Note that the notion of ‘‘time’’ is indexed by a pair  $(t, k)$ , and follows the lexicographical order.

To see why the second equality holds, notice that

$$\begin{aligned}\Sigma_t^{-1}\bar{\theta}_t &= \frac{1}{\sigma^2} \sum_{\tau=1}^{t-1} \sum_{k=1}^{|A^\tau|} \phi_{a_k^\tau} \left( \phi_{a_k^\tau}^T \theta^* + \eta_{\tau,k} \right) \\ &= \left( \Sigma_t^{-1} - \frac{1}{\lambda^2} I \right) \theta^* + \frac{1}{\sigma^2} \xi_t.\end{aligned}$$

Hence, for any  $e \in E$ , we have

$$\begin{aligned}|\langle \phi_e, \bar{\theta}_t - \theta^* \rangle| &= \left| \phi_e^T \Sigma_t \left( \frac{1}{\sigma^2} \xi_t - \frac{1}{\lambda^2} \theta^* \right) \right| \\ &\leq \|\phi_e\|_{\Sigma_t} \left\| \frac{1}{\sigma^2} \xi_t - \frac{1}{\lambda^2} \theta^* \right\|_{\Sigma_t} \\ &\leq \|\phi_e\|_{\Sigma_t} \left[ \frac{1}{\sigma^2} \|\xi_t\|_{\Sigma_t} + \frac{1}{\lambda^2} \|\theta^*\|_{\Sigma_t} \right],\end{aligned}$$

where the first inequality follows from the Cauchy-Schwarz inequality, and the second inequality follows from the triangular inequality. Notice that

$$\|\theta^*\|_{\Sigma_t} \leq \|\theta^*\|_{\Sigma_1} = \lambda \|\theta^*\|_2,$$

hence we have

$$|\langle \phi_e, \bar{\theta}_t - \theta^* \rangle| \leq \|\phi_e\|_{\Sigma_t} \left[ \frac{1}{\sigma^2} \|\xi_t\|_{\Sigma_t} + \frac{1}{\lambda} \|\theta^*\|_2 \right].$$

Moreover, we have

$$\frac{1}{\sigma^2} \|\xi_t\|_{\Sigma_t} = \frac{1}{\sigma^2} \|\xi_t\|_{\sigma^2 V_t^{-1}} = \frac{1}{\sigma} \|\xi_t\|_{V_t^{-1}}.$$

So we have

$$|\langle \phi_e, \bar{\theta}_t - \theta^* \rangle| \leq \|\phi_e\|_{\Sigma_t} \left[ \frac{1}{\sigma} \|\xi_t\|_{V_t^{-1}} + \frac{1}{\lambda} \|\theta^*\|_2 \right]. \quad (37)$$

The above inequality always holds. We now provide a high probability bound on  $\|\xi_t\|_{V_t^{-1}}$ , based on the ‘‘self normalized bound’’ proposed in (Abbasi-Yadkori et al., 2011). From Theorem 1 of (Abbasi-Yadkori et al., 2011), we know for any  $\delta \in (0, 1)$ , with probability at least  $1 - \delta$ ,

$$\|\xi_t\|_{V_t^{-1}} \leq \sqrt{2 \log \left( \frac{\det(V_t)^{1/2} \det(V_1)^{-1/2}}{\delta} \right)} \quad \forall t = 1, 2, \dots$$

Obviously,  $\det(V_1) = \left[ \frac{\sigma^2}{\lambda^2} \right]^d$ , on the other hand, we have

$$[\det(V_t)]^{1/d} \leq \frac{\text{trace}(V_t)}{d} = \frac{\sigma^2}{\lambda^2} + \frac{1}{d} \sum_{\tau=1}^{t-1} \sum_{k=1}^{|A^\tau|} \|\phi_{a_k^\tau}\|^2 \leq \frac{\sigma^2}{\lambda^2} + \frac{(t-1)K}{d},$$

where the last inequality follows from the assumption that  $\|\phi_e\| \leq 1$ . Hence, for  $t \leq n$ , we have

$$[\det(V_t)]^{1/d} \leq \frac{\sigma^2}{\lambda^2} + \frac{nK}{d}.$$

Thus, with probability at least  $1 - \delta$ , we have

$$\|\xi_t\|_{V_t^{-1}} \leq \sqrt{d \log \left( 1 + \frac{nK\lambda^2}{d\sigma^2} \right) + 2 \log \left( \frac{1}{\delta} \right)} \quad \forall t = 1, 2, \dots, n.$$



Thus, we have the following lemma:

**Lemma 6.** For any  $\lambda, \sigma > 0$  and any  $\delta \in (0, 1)$ , with probability at least  $1 - \delta$ , we have

$$|\langle \phi_e, \bar{\theta}_t - \theta^* \rangle| \leq \|\phi_e\|_{\Sigma_t} \left[ \frac{1}{\sigma} \sqrt{d \log \left( 1 + \frac{nK\lambda^2}{d\sigma^2} \right)} + 2 \log \left( \frac{1}{\delta} \right) + \frac{\|\theta^*\|_2}{\lambda} \right], \quad (38)$$

for all  $t = 1, 2, \dots, n$ , and for all  $e \in E$ .

Notice that  $\|\phi_e\|_{\Sigma_t} = \sqrt{\phi_e^T \Sigma_t \phi_e}$ , thus, the above lemma immediately implies the following lemma:

**Lemma 7.** For any  $\lambda, \sigma > 0$ , any  $\delta \in (0, 1)$ , and any

$$c \geq \frac{1}{\sigma} \sqrt{d \log \left( 1 + \frac{nK\lambda^2}{d\sigma^2} \right)} + 2 \log \left( \frac{1}{\delta} \right) + \frac{\|\theta^*\|_2}{\lambda},$$

with probability at least  $1 - \delta$ , we have

$$\langle \phi_e, \bar{\theta}_t \rangle - c \sqrt{\phi_e^T \Sigma_t \phi_e} \leq \langle \phi_e, \theta^* \rangle \leq \langle \phi_e, \bar{\theta}_t \rangle + c \sqrt{\phi_e^T \Sigma_t \phi_e},$$

for all  $e \in E$  and  $t = 1, 2, \dots, n$ .

Notice that

$$\langle \phi_e, \theta^* \rangle \leq \langle \phi_e, \bar{\theta}_t \rangle + c \sqrt{\phi_e^T \Sigma_t \phi_e}$$

is exactly  $\bar{\mathbf{w}}(e) \leq \hat{\mathbf{w}}_t(e)$ .

## B.2. Regret Analysis

We define event  $G$  as

$$G = \left\{ \langle \phi_e, \bar{\theta}_t \rangle - c \sqrt{\phi_e^T \Sigma_t \phi_e} \leq \langle \phi_e, \theta^* \rangle \leq \langle \phi_e, \bar{\theta}_t \rangle + c \sqrt{\phi_e^T \Sigma_t \phi_e} \forall e \in E, \forall t = 1, \dots, n \right\}, \quad (39)$$

and use  $\bar{G}$  to denote the complement of event  $G$ . Recall that Lemma 7 states that if

$$c \geq \frac{1}{\sigma} \sqrt{d \log \left( 1 + \frac{nK\lambda^2}{d\sigma^2} \right)} + 2 \log \left( \frac{1}{\delta} \right) + \frac{1}{\lambda} \|\theta^*\|_2, \quad (40)$$

then  $\mathbb{P}(G) \geq 1 - \delta$ . Moreover, by definition, under event  $G$ , we have  $\bar{\mathbf{w}}(e) \leq \hat{\mathbf{w}}_t(e)$ , for all  $t = 1, \dots, n$  and any  $e \in E$ .

Notice that

$$\begin{aligned} R(n) &= \sum_{t=1}^n \mathbb{E} \left[ \sum_{e \in A^*} \mathbf{w}_t(e) - \sum_{e \in A^t} \mathbf{w}_t(e) \right] \\ &= \sum_{t=1}^n \mathbb{E} \left[ \sum_{e \in A^*} \bar{\mathbf{w}}(e) - \sum_{e \in A^t} \bar{\mathbf{w}}(e) \right] \\ &= \mathbb{P}(G) \sum_{t=1}^n \mathbb{E} \left[ \sum_{e \in A^*} \bar{\mathbf{w}}(e) - \sum_{e \in A^t} \bar{\mathbf{w}}(e) \middle| G \right] + \mathbb{P}(\bar{G}) \sum_{t=1}^n \mathbb{E} \left[ \sum_{e \in A^*} \bar{\mathbf{w}}(e) - \sum_{e \in A^t} \bar{\mathbf{w}}(e) \middle| \bar{G} \right] \\ &\leq \sum_{t=1}^n \mathbb{E} \left[ \sum_{e \in A^*} \bar{\mathbf{w}}(e) - \sum_{e \in A^t} \bar{\mathbf{w}}(e) \middle| G \right] + \mathbb{P}(\bar{G}) nK, \end{aligned}$$

where the last inequality follows from the naive bound on the realized regret. If  $c$  satisfies inequality (40), we have  $\mathbb{P}(\tilde{G}) \leq \delta$ , hence we have

$$R(n) \leq \sum_{t=1}^n \mathbb{E} \left[ \sum_{e \in A^*} \bar{w}(e) - \sum_{e \in A^t} \bar{w}(e) \middle| G \right] + nK\delta.$$

Finally, we bound  $\sum_{t=1}^n \mathbb{E} \left[ \sum_{e \in A^*} \bar{w}(e) - \sum_{e \in A^t} \bar{w}(e) \middle| G \right]$  using a worst-case bound conditioning on  $G$  (worst-case over all the possible random realizations), notice that conditioning on  $G$ , we have

$$\sum_{e \in A^*} \bar{w}(e) \leq \sum_{e \in A^*} \hat{w}_t(e) \leq \sum_{e \in A^t} \hat{w}_t(e),$$

where the first inequality follows from the definition of event  $G$ , and the second inequality follows from that  $A^t$  is the *exact* solution of the combinatorial optimization problem  $(E, \mathcal{A}, \hat{w}_t)$ . Thus we have

$$\begin{aligned} \sum_{e \in A^*} \bar{w}(e) - \sum_{e \in A^t} \bar{w}(e) &\leq \sum_{e \in A^t} \hat{w}_t(e) - \sum_{e \in A^t} \bar{w}(e) \\ &= \sum_{e \in A^t} \left[ \langle \phi_e, \bar{\theta}_t - \theta^* \rangle + c\sqrt{\phi_e^T \Sigma_t \phi_e} \right] \\ &\leq 2c \sum_{e \in A^t} \sqrt{\phi_e^T \Sigma_t \phi_e}, \end{aligned}$$

where the last inequality follows from the definition of  $G$ . Recall that from Lemma 4, we have

$$\sum_{t=1}^n \sum_{e \in A^t} \sqrt{\phi_e^T \Sigma_t \phi_e} \leq K\lambda \sqrt{\frac{dn \log \left(1 + \frac{nK\lambda^2}{d\sigma^2}\right)}{\log \left(1 + \frac{\lambda^2}{\sigma^2}\right)}}.$$

Thus we have

$$\sum_{t=1}^n \mathbb{E} \left[ \sum_{e \in A^*} \bar{w}(e) - \sum_{e \in A^t} \bar{w}(e) \middle| G \right] \leq 2c\mathbb{E} \left[ \sum_{t=1}^n \sum_{e \in A^t} \sqrt{\phi_e^T \Sigma_t \phi_e} \right] \leq 2cK\lambda \sqrt{\frac{dn \log \left(1 + \frac{nK\lambda^2}{d\sigma^2}\right)}{\log \left(1 + \frac{\lambda^2}{\sigma^2}\right)}},$$

which implies

$$R(n) \leq 2cK\lambda \sqrt{\frac{dn \log \left(1 + \frac{nK\lambda^2}{d\sigma^2}\right)}{\log \left(1 + \frac{\lambda^2}{\sigma^2}\right)}} + nK\delta.$$

## C. Technical Lemma

In this section, we derive Equation (36). We first prove the following technical lemma:

**Lemma 8.** For any  $\phi, \bar{\theta} \in \mathbb{R}^d$ , any positive definite  $\Sigma \in \mathbb{R}^{d \times d}$ , any  $\sigma > 0$ , and any  $w \in \mathbb{R}$ , if we define

$$\begin{aligned} \Sigma_{\text{new}} &= \Sigma - \frac{\Sigma \phi \phi^T \Sigma}{\phi^T \Sigma \phi + \sigma^2} \\ \bar{\theta}_{\text{new}} &= \left[ I - \frac{\Sigma \phi \phi^T}{\phi^T \Sigma \phi + \sigma^2} \right] \bar{\theta} + \left[ \frac{\Sigma \phi}{\phi^T \Sigma \phi + \sigma^2} \right] w, \end{aligned}$$

then we have

$$\Sigma_{\text{new}}^{-1} = \Sigma^{-1} + \frac{1}{\sigma^2} \phi \phi^T \tag{41}$$

$$\Sigma_{\text{new}}^{-1} \bar{\theta}_{\text{new}} = \Sigma^{-1} \bar{\theta} + \frac{1}{\sigma^2} \phi w. \tag{42}$$

*Proof.* Notice that Equation (41) follows directly from the Woodbury matrix identity (matrix inversion lemma). We now prove Equation (42). Notice that we have

$$\begin{aligned}\bar{\theta}_{\text{new}} &= \left[ I - \frac{\Sigma\phi\phi^T}{\phi^T\Sigma\phi + \sigma^2} \right] \bar{\theta} + \left[ \frac{\Sigma\phi}{\phi^T\Sigma\phi + \sigma^2} \right] w \\ &= \left[ \Sigma - \frac{\Sigma\phi\phi^T\Sigma}{\phi^T\Sigma\phi + \sigma^2} \right] \Sigma^{-1}\bar{\theta} + \left[ \frac{\Sigma\phi}{\phi^T\Sigma\phi + \sigma^2} \right] w \\ &= \Sigma_{\text{new}}\Sigma^{-1}\bar{\theta} + \left[ \frac{\Sigma\phi}{\phi^T\Sigma\phi + \sigma^2} \right] w,\end{aligned}$$

that is,

$$\Sigma_{\text{new}}^{-1}\bar{\theta}_{\text{new}} = \Sigma^{-1}\bar{\theta} + \left[ \frac{\Sigma_{\text{new}}^{-1}\Sigma\phi}{\phi^T\Sigma\phi + \sigma^2} \right] w. \quad (43)$$

Notice that

$$\Sigma_{\text{new}}^{-1}\Sigma\phi = \left[ \Sigma^{-1} + \frac{1}{\sigma^2}\phi\phi^T \right] \Sigma\phi = \phi + \frac{\phi^T\Sigma\phi}{\sigma^2}\phi = \frac{\sigma^2 + \phi^T\Sigma\phi}{\sigma^2}\phi. \quad (44)$$

Plug Equation (44) into Equation (43), we have Equation (42).  $\square$

Based on Lemma 8, by mathematical induction, we have

$$\begin{aligned}\Sigma_t^{-1} &= \Sigma_1^{-1} + \frac{1}{\sigma^2} \sum_{\tau=1}^{t-1} \sum_{k=1}^{|A^\tau|} \phi_{a_k^\tau} \phi_{a_k^\tau}^T \\ \Sigma_t^{-1}\bar{\theta}_t &= \Sigma_1^{-1}\bar{\theta}_1 + \frac{1}{\sigma^2} \sum_{\tau=1}^{t-1} \sum_{k=1}^{|A^\tau|} \phi_{a_k^\tau} \mathbf{w}_\tau(a_k^\tau),\end{aligned}$$

further noting that  $\Sigma_1 = \lambda^2 I$  and  $\bar{\theta}_1 = 0$ , we can derive Equation (36).

## D. A Variant of Theorem 2 for Approximation Algorithms

By suitably redefining the realized regret, we can prove a variant of Theorem 2 in which ORACLE can be an approximation algorithm. Specifically, for a (possibly approximation) algorithm ORACLE, let  $A^*(\mathbf{w})$  be the solution of ORACLE to the optimization problem  $(E, \mathcal{A}, \mathbf{w})$ , we say  $\gamma \in [0, 1)$  is a *sub-optimality gap* of ORACLE if

$$f(A^*(\mathbf{w}), \mathbf{w}) \geq (1 - \gamma) \max_{A \in \mathcal{A}} f(A, \mathbf{w}), \quad \forall \mathbf{w}. \quad (45)$$

Then we define the (scaled) realized regret  $R_t^\gamma$  as

$$R_t^\gamma = f(A^{\text{opt}}, \mathbf{w}_t) - \frac{f(A^t, \mathbf{w}_t)}{1 - \gamma}, \quad (46)$$

where  $A^{\text{opt}}$  is the exact solution to the optimization problem  $(E, \mathcal{A}, \bar{\mathbf{w}})$ . The (scaled) cumulative regret  $R^\gamma(n)$  is defined as

$$R^\gamma(n) = \sum_{t=1}^n \mathbb{E} [R_t^\gamma | \bar{\mathbf{w}}].$$

Under the assumptions that (1) the support of  $P$  is a subset of  $[0, 1]^L$  (i.e.  $\mathbf{w}_t(e) \in [0, 1] \forall t$  and  $\forall e \in E$ ), (2) the item weight  $\mathbf{w}(e)$ 's are statistically independent under  $P$ , and (3) the oracle ORACLE has sub-optimality gap  $\gamma \in [0, 1)$ , we have the following variant of Theorem 2 when CombLinUCB is applied to coherent learning cases:

**Theorem 4.** For any  $\lambda, \sigma > 0$ , any  $\delta \in (0, 1)$ , and any  $c$  satisfying

$$c \geq \frac{1}{\sigma} \sqrt{d \ln \left( 1 + \frac{nK\lambda^2}{d\sigma^2} \right) + 2 \ln \left( \frac{1}{\delta} \right) + \frac{\|\theta^*\|_2}{\lambda}}, \quad (47)$$

if  $\bar{\mathbf{w}} = \Phi\theta^*$  and the above three assumptions hold, then under CombLinUCB algorithm with parameter  $(\Phi, \lambda, \sigma, c)$ , we have

$$R^\gamma(n) \leq \frac{2cK\lambda}{1-\gamma} \sqrt{\frac{dn \ln \left( 1 + \frac{nK\lambda^2}{d\sigma^2} \right)}{\ln \left( 1 + \frac{\lambda^2}{\sigma^2} \right)}} + nK\delta.$$

*Proof.* Notice that Lemma 7 in Section B.1 still holds. With  $G$  defined in Equation (39), we have

$$\begin{aligned} R^\gamma(n) &= \sum_{t=1}^n \mathbb{E} \left[ \sum_{e \in A^{\text{opt}}} \mathbf{w}_t(e) - \frac{1}{1-\gamma} \sum_{e \in A^t} \mathbf{w}_t(e) \right] \\ &= \sum_{t=1}^n \mathbb{E} \left[ \sum_{e \in A^{\text{opt}}} \bar{\mathbf{w}}(e) - \frac{1}{1-\gamma} \sum_{e \in A^t} \bar{\mathbf{w}}(e) \right] \\ &= \mathbb{P}(G) \sum_{t=1}^n \mathbb{E} \left[ \sum_{e \in A^{\text{opt}}} \bar{\mathbf{w}}(e) - \frac{1}{1-\gamma} \sum_{e \in A^t} \bar{\mathbf{w}}(e) \middle| G \right] + \mathbb{P}(\bar{G}) \sum_{t=1}^n \mathbb{E} \left[ \sum_{e \in A^{\text{opt}}} \bar{\mathbf{w}}(e) - \frac{1}{1-\gamma} \sum_{e \in A^t} \bar{\mathbf{w}}(e) \middle| \bar{G} \right] \\ &\leq \sum_{t=1}^n \mathbb{E} \left[ \sum_{e \in A^{\text{opt}}} \bar{\mathbf{w}}(e) - \frac{1}{1-\gamma} \sum_{e \in A^t} \bar{\mathbf{w}}(e) \middle| G \right] + \mathbb{P}(\bar{G}) nK, \end{aligned}$$

where the last inequality follows from the naive bound on  $R_t^\gamma$ . If  $c$  satisfies inequality (40), we have  $\mathbb{P}(\bar{G}) \leq \delta$ , hence we have

$$R^\gamma(n) \leq \sum_{t=1}^n \mathbb{E} \left[ \sum_{e \in A^{\text{opt}}} \bar{\mathbf{w}}(e) - \frac{1}{1-\gamma} \sum_{e \in A^t} \bar{\mathbf{w}}(e) \middle| G \right] + nK\delta.$$

Finally, we bound  $\sum_{t=1}^n \mathbb{E} \left[ \sum_{e \in A^{\text{opt}}} \bar{\mathbf{w}}(e) - \frac{1}{1-\gamma} \sum_{e \in A^t} \bar{\mathbf{w}}(e) \middle| G \right]$  using a worst-case bound conditioning on  $G$  (worst-case over all the possible random realizations), notice that conditioning on  $G$ , we have

$$\sum_{e \in A^{\text{opt}}} \bar{\mathbf{w}}(e) \leq \sum_{e \in A^{\text{opt}}} \hat{\mathbf{w}}_t(e) \leq \max_{A \in \mathcal{A}} \sum_{e \in A} \hat{\mathbf{w}}_t(e) \leq \frac{1}{1-\gamma} \sum_{e \in A^t} \hat{\mathbf{w}}_t(e),$$

where

- The first inequality follows from the definition of event  $G$ . Specifically, under event  $G$ ,  $\bar{\mathbf{w}}(e) \leq \hat{\mathbf{w}}_t(e)$  for all  $t = 1, \dots, n$  and all  $e \in E$ .
- The second inequality follows from  $A^{\text{opt}} \in \mathcal{A}$ .
- The last inequality follows from  $A^t \leftarrow \text{ORACLE}(E, \mathcal{A}, \hat{\mathbf{w}}_t)$  and ORACLE has sub-optimality gap  $\gamma$  (see Equation (45)).

Thus we have

$$\begin{aligned} \sum_{e \in A^{\text{opt}}} \bar{\mathbf{w}}(e) - \frac{1}{1-\gamma} \sum_{e \in A^t} \bar{\mathbf{w}}(e) &\leq \frac{1}{1-\gamma} \left[ \sum_{e \in A^t} \hat{\mathbf{w}}_t(e) - \sum_{e \in A^t} \bar{\mathbf{w}}(e) \right] \\ &= \frac{1}{1-\gamma} \sum_{e \in A^t} \left[ \langle \phi_e, \bar{\theta}_t - \theta^* \rangle + c \sqrt{\phi_e^T \Sigma_t \phi_e} \right] \\ &\leq \frac{2c}{1-\gamma} \sum_{e \in A^t} \sqrt{\phi_e^T \Sigma_t \phi_e}, \end{aligned}$$

where the last inequality follows from the definition of  $G$ . Recall that from Lemma 4, we also have

$$\sum_{t=1}^n \sum_{e \in A^t} \sqrt{\phi_e^T \Sigma_t \phi_e} \leq K\lambda \sqrt{\frac{dn \log \left(1 + \frac{nK\lambda^2}{d\sigma^2}\right)}{\log \left(1 + \frac{\lambda^2}{\sigma^2}\right)}}.$$

Putting the above inequalities together, we have proved the theorem. □
